# Supplementary material
Source: publisher site journal article supplement (https://www.dovepress.com/article/353717)
Supplement: Supplementary file 1 [file get_supplementary_file.php]

**Supplementary table 1** The list of 30 differentially expressed proteins (DEPs) in kidney of mice among the control group, DKD and GLP-1RA group by LFQ-based proteomic analysis.

| **Protein Name** | ***P* value** | |
| --- | --- | --- |
| **DKD *vs* Control** | **GLP-1RA *vs* DKD** |
| ANXA7 | 0.010 | 0.035 |
| CPT2 | 0.005 | 0.012 |
| SRPRA | 0.040 | 0.026 |
| RRAS | 0.021 | 0.012 |
| VCL | 0.012 | 0.024 |
| TARDBP | 0.025 | 0.020 |
| TMED5 | 0.040 | 0.009 |
| APOA1 | 0.013 | 0.048 |
| MTND5 | 0.020 | 0.017 |
| FSCN1 | 0.048 | 0.017 |
| SFPQ | 0.015 | 0.010 |
| GSTT1 | 0.035 | 0.045 |
| CENPV | 0.005 | 0.003 |
| ICA | 0.004 | 0.003 |
| PITRM1 | 0.002 | 0.042 |
| PLIN3 | 0.001 | 0.010 |
| MUP20 | 0.002 | 0.006 |
| MUP18 | 0.001 | 0.001 |
| SVS6 | 0.010 | ＜0.001 |
| NCL | 0.011 | 0.006 |
| MOGAT1 | 0.026 | 0.019 |
| EPB41L1 | 0.019 | 0.004 |
| ARL1 | 0.017 | 0.031 |
| NAMPT | 0.036 | 0.003 |
| GBP2 | 0.012 | ＜0.001 |
| CYP2C50 | 0.040 | ＜0.001 |
| HSD17B12 | 0.019 | 0.001 |
| NARS1 | 0.049 | 0.036 |
| SPRYD4 | ＜0.001 | 0.022 |
| GSTM1 | 0.038 | 0.012 |

**Abbreviations:** ANXA7, annexin a7; CPT2, carnitine O-palmitoyltransferase 2, mitochondrial; SRPRA, signal recognition particle receptor subunit alpha; RRAS, ras-related protein R-ras; VCL, vinculin; TARDBP, TAR DNA-binding protein 43; TMED5, transmembrane emp24 domain-containing protein 5; APOA1, apolipoprotein A-I; MTND5, NADH-ubiquinone oxidoreductase chain 5; FSCN1, fascin; SFPQ, splicing factor, proline- and glutamine-rich; GSTT1, glutathione S-transferase theta-1; CENPV, centromere protein V; ICA, inhibitor of carbonic anhydrase; PITRM1, presequence protease, mitochondrial; PLIN3, perilipin-3; MUP20, major urinary protein 20; MUP18, major urinary protein 18; SVS6, seminal vesicle secretory protein 6; NCL, nucleolin; MOGAT1, 2-acylglycerol O-acyltransferase 1; EPB41L1, band 4.1-like protein 1; ARL1, ADP-ribosylation factor-like protein 1; NAMPT, nicotinamide phosphoribosyltransferase; GBP2, guanylate-binding protein 2; CYP2C50, cytochrome P450 2C50; HSD17B12, very-long-chain 3-oxoacyl-CoA reductase; NARS1, asparagine--tRNA ligase, cytoplasmic; SPRYD4, SPRY domain-containing protein 4; GSTM1, glutathione S-transferase Mu 1.


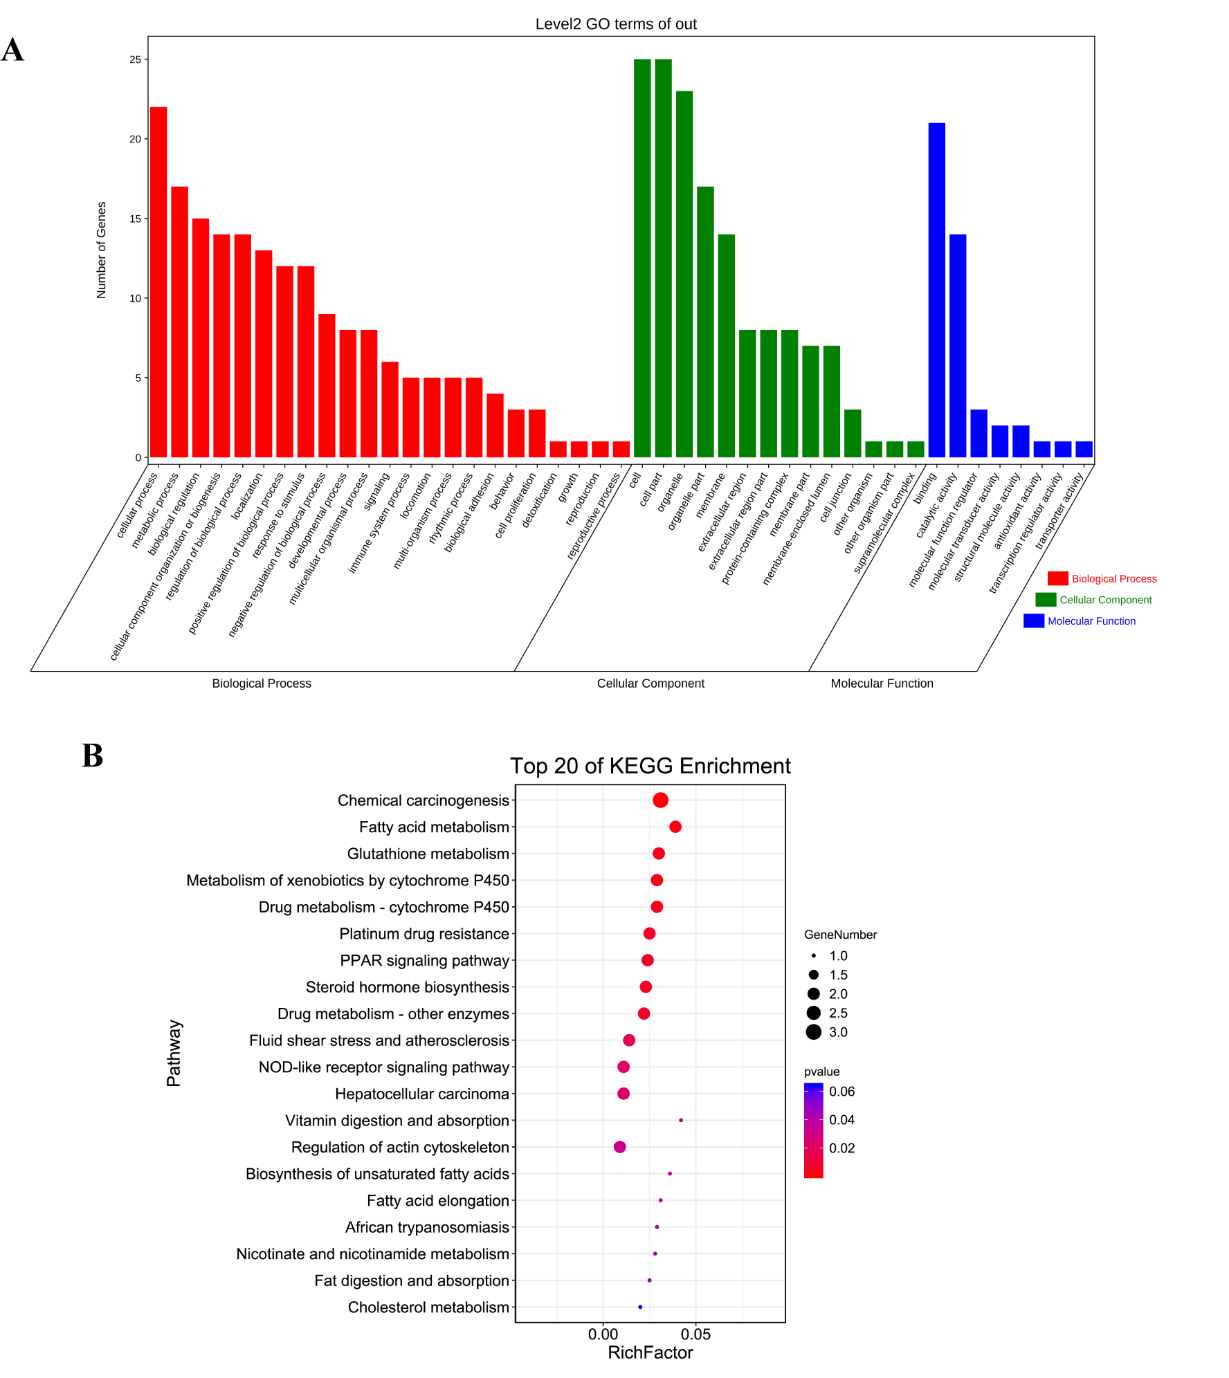


**Supplementary figure 1**GO analysis and KEGG enrichment analysis of 30 DEPs among the control group, DKD and GLP-1RA group.(A) GO analysis of 30 DEPs among three groups. (B) KEGG enrichment analysis of 30 DEPs among three groups.
